# Supplementary material for: Retinal inner nuclear layer volume reflects inflammatory disease activity in multiple sclerosis; a longitudinal OCT study
Source: PubMed Central journal article supplement — Mult Scler J Exp Transl Clin. 2019 Sep 5;5(3):2055217319871582. doi: 10.1177/2055217319871582 (PMC6728683; doi:10.1177/2055217319871582), 2019-09-05

**Supplementary Figure 1.** Scatterplot showing the associations (with regression line and mean 95%CI) between (A) INL and GCIPL volume, (B) INL volume and pRNFL thickness and (C) GCIPL volume and pRNFL thickness, stratified by episodes of MSON during follow-up. Reported effects are standardized beta's with p-value, based on GEE models.

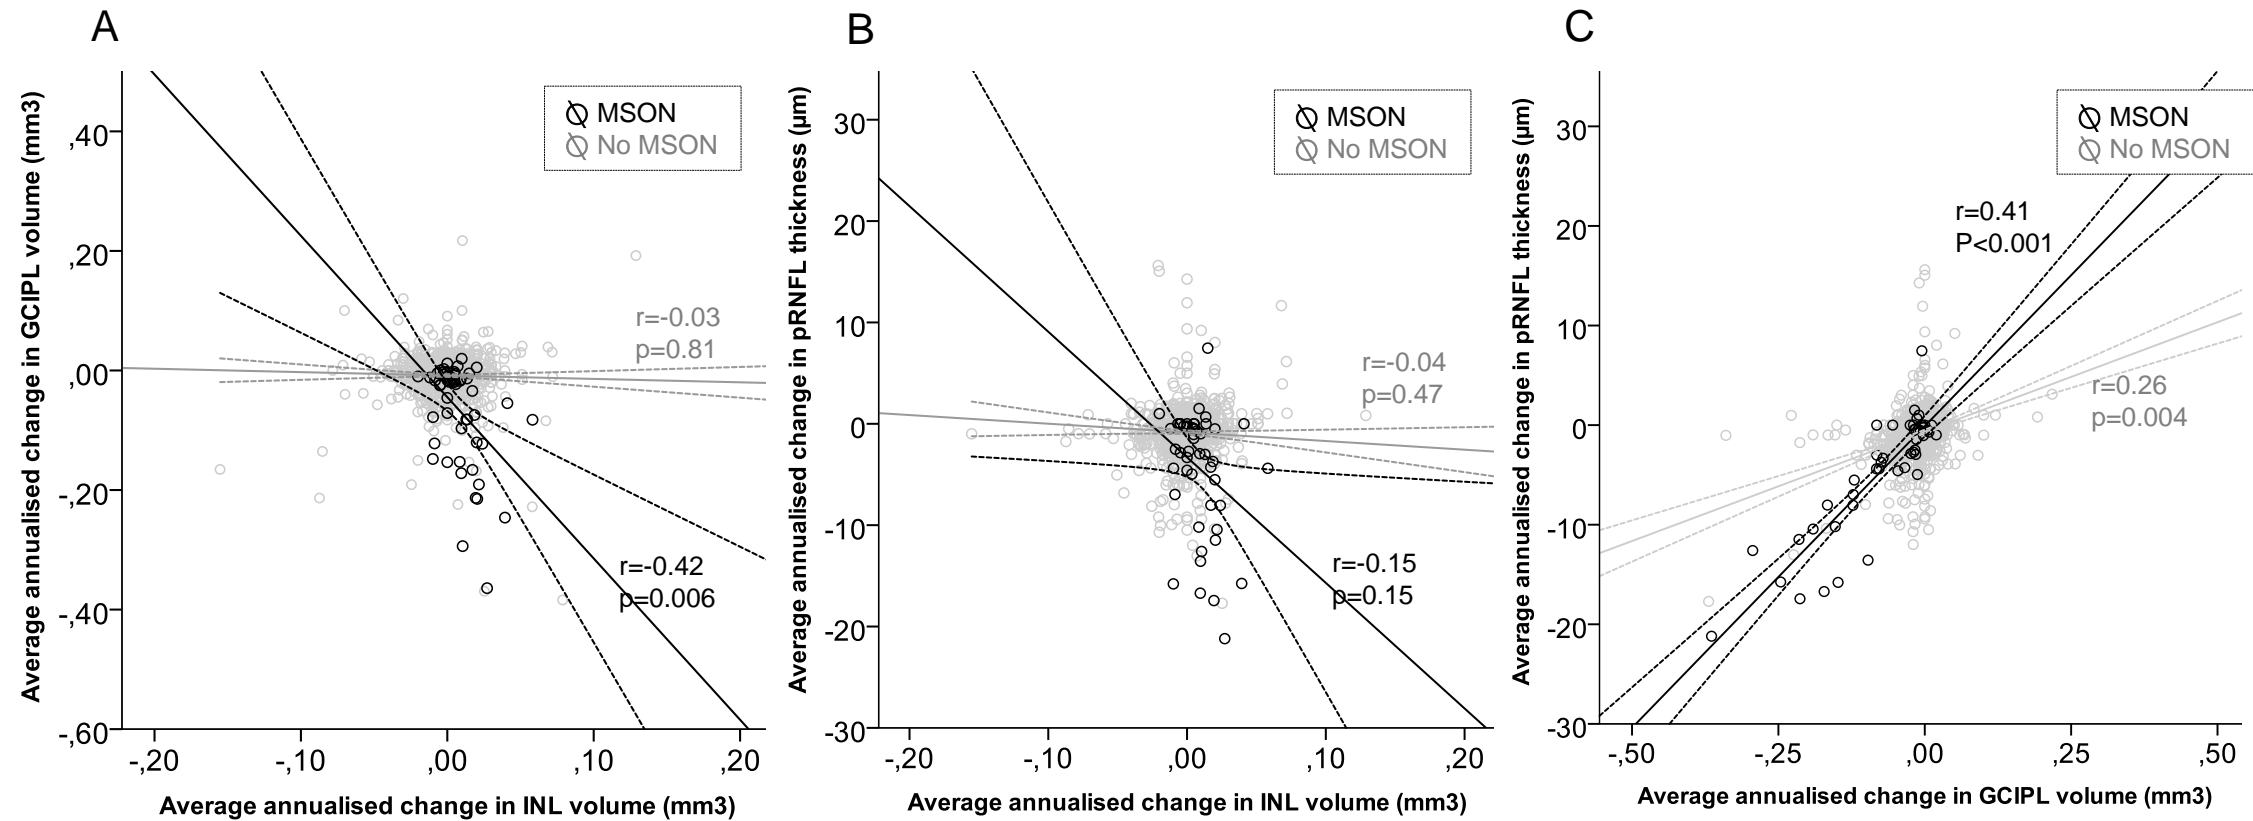

Supplement: Supplemental_Material.pdf [file Supplemental_Material.pdf]
